# Supplementary material for: End‐Diastolic Forward Flow and Restrictive Physiology in Repaired Tetralogy of Fallot: A Systematic Review and Meta‐Analysis
Source: PubMed Central journal article supplement — J Am Heart Assoc. 2022 Mar 18;11(7):e024036. doi: 10.1161/JAHA.121.024036 (PMC9075485; doi:10.1161/jaha.121.024036), 2022-03-18

# **SUPPLEMENTAL MATERIAL**

## **Data S1.**

### **Supplemental Methods**

#### *Search strategy.*

PubMed (n=200 on March 8, 2021)

("Tetralogy of Fallot"[Mesh] OR fallot\* tetralogy OR tetralogy of fallot) AND (restrictive OR end-diastolic forward flow OR end diastolic forward flow OR antegrade diastolic pulmonary flow OR antegrade diastolic pulmonary artery flow OR antegrade diastolic flow) in all fields

Embase (n=210 on March 8, 2021)

('fallot tetralogy'/exp OR 'fallot\* tetralogy' OR 'tetralogy of fallot') AND ('restrictive' OR 'end-diastolic forward flow' OR 'end diastolic forward flow' OR 'antegrade diastolic pulmonary flow' OR 'antegrade diastolic pulmonary artery flow' OR 'antegrade diastolic flow') in all fields

Scopus (n=142 on March 8, 2021)

( TITLE-ABS-KEY ("fallot's tetralogy" OR "fallot\* tetralogy" OR "tetralogy of fallot") AND TITLE-ABS-KEY ("restrictive" OR "end-diastolic forward flow" OR "end diastolic forward flow" OR "antegrade diastolic pulmonary flow" OR "antegrade diastolic pulmonary artery flow" OR "antegrade diastolic flow") )

## **Supplemental Results**

### Subgroup analyses

Subgroup analysis revealed that significantly different results were observed by prospective and retrospective studies for the following variables: right ventricular mass indexed (RVMi), right ventricular end-diastolic pressure (RVEDP), left ventricular stroke volume indexed (LVSVi), and left ventricular ejection fraction (LVEF). Prospective studies reported a significantly greater RVMi in end-diastolic forward flow (EDFF) (mean difference [MD] 3.81 g/m<sup>2</sup>, 95% CI 1.42-6.21, 6 studies), whereas a retrospective study<sup>37</sup> reported lower RVMi (MD -0.70 g/m<sup>2</sup>, 95% CI -1.21;-0.18, 1 study) (p<0.001). Furthermore, retrospective studies reported higher RVEDP in patients with EDFF (MD 1.78, 95% CI 0.93-2.63, 3 studies), as well as lower LVSVi (MD -2.03, 95% CI -2.48;-1.57, 1 study<sup>37</sup>) and higher LVEF (MD 0.95%, 95% CI 0.60-1.30, 6 studies). In contrast, prospective studies found no significant differences in either RVEDP (MD 0.00 mmHg, 95% CI -0.75-0.75, 1 study<sup>25</sup>), LVSVi (MD -0.25 ml/m<sup>2</sup>, 95% CI -1.13-0.63, 1 study<sup>27</sup>), or LVEF (MD -1.08%, 95% CI -2.37-0.21, 3 studies) (test for subgroup differences: all p<0.001). Lastly, the association between transannular patch repair and EDFF found by prospective studies (odds ratio [OR] 2.46, 95% CI 1.47-4.13, 14 studies) was greater than that found by retrospective studies (OR 1.38, 95% CI 0.51-3.73, 7 studies) (test for subgroup differences: p=0.001). No other significant interaction effects were observed.

### Meta-regression analyses

Meta-regression analysis revealed that in more recent samples (higher mean year of enrollment) reported a larger MD for right ventricular end-diastolic volume indexed (RVEDVi) (regression coefficient 1.762, 95% CI 0.395-3.129, p=0.018, 10 studies) and aortic cross-clamp time (regression coefficient 0.844, 95% CI 0.138-1.550, p=0.029, 6 studies) in EDFF compared to no EDFF. Furthermore, larger MD for RVEDVi were associated with larger MD for right

ventricular stroke volume indexed (RVSVi) (regression coefficient 0.465, 95% CI 0.144-0.786,  $p=0.016$ , 6 studies) and pulmonary regurgitation fraction (regression coefficient 0.214, 95% CI 0.003-0.424,  $p=0.048$ , 8 studies). Lastly, it was found that older age at evaluation was associated with smaller MD for RVSVi (regression coefficient -1.142, 95% CI -1.610;-0.674,  $p=0.003$ , 6 studies) and greater MD for N-terminal pro-brain natriuretic peptide (NT-proBNP) (regression coefficient 15.324, 95% CI 0.797-29.850,  $p=0.047$ , 3 studies). No other significant associations were found.

**Figure S1. Forest plots.** CI, confidence interval; EDFF, end-diastolic forward flow; MD, mean difference; SD, standard deviation.

### A. Age at repair (years)

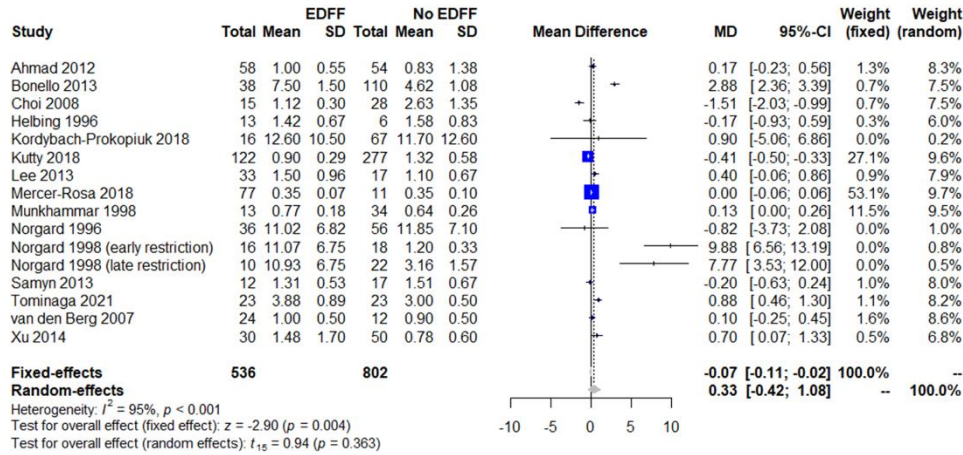

### B. Time of follow-up since repair (years)

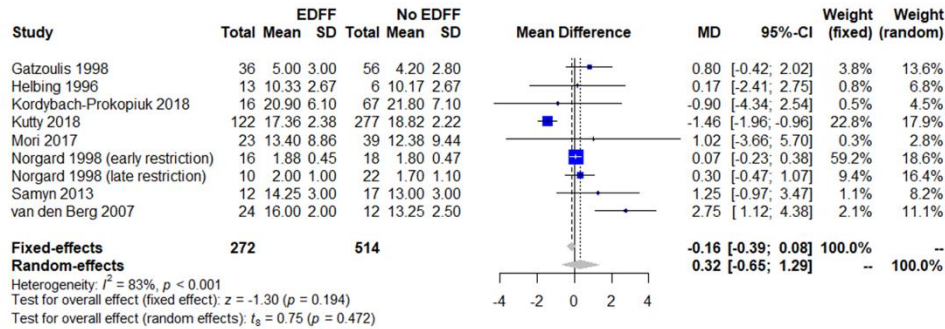

### C. Age at study (years)

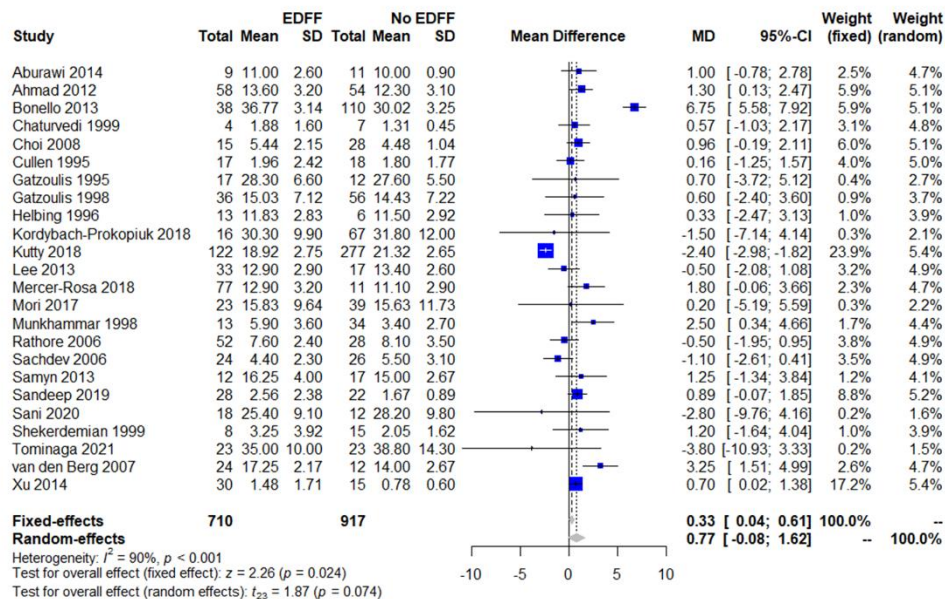

**Figure S2. Forest plots.** BT, Blalock-Taussig; CI, confidence interval; EDFF, end-diastolic forward flow; MD, mean difference; OR, odds ratio; RVPA, right ventricle-pulmonary artery; SD, standard deviation.

### A. Previous RVPA shunt

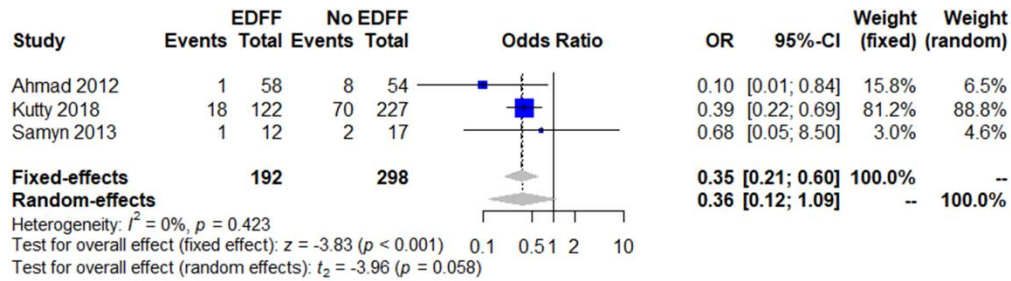

### B. Previous BT shunt

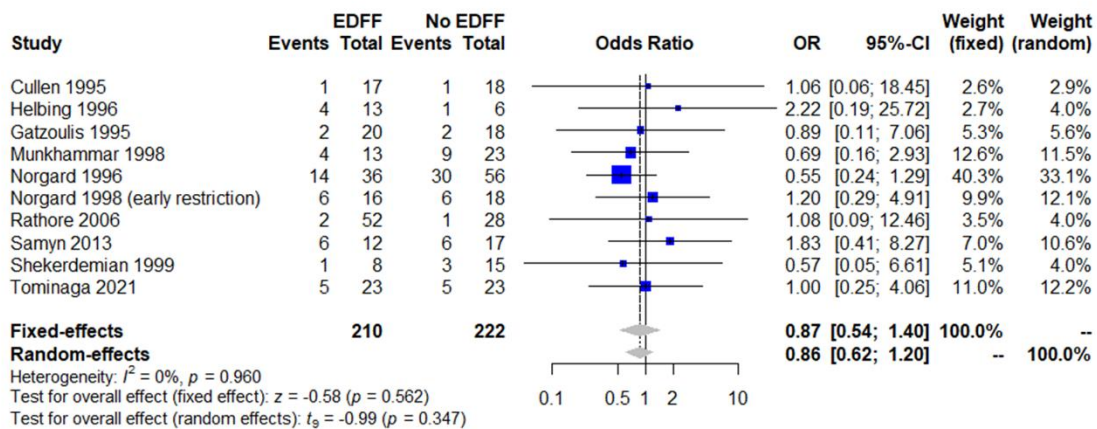

### C. Aortic cross-clamp time (min)

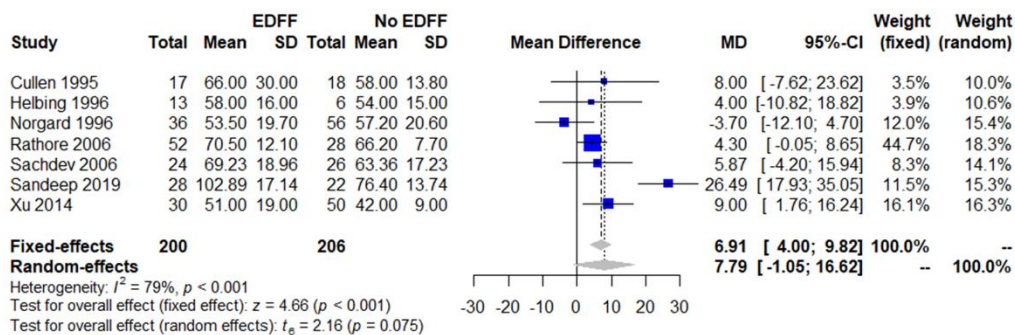

**Figure S3. Forest plots.** CI, confidence interval; CPB, cardiopulmonary bypass; EDFF, end-diastolic forward flow; MD, mean difference; OR, odds ratio; SD, standard deviation.

### A. CPB time (min)

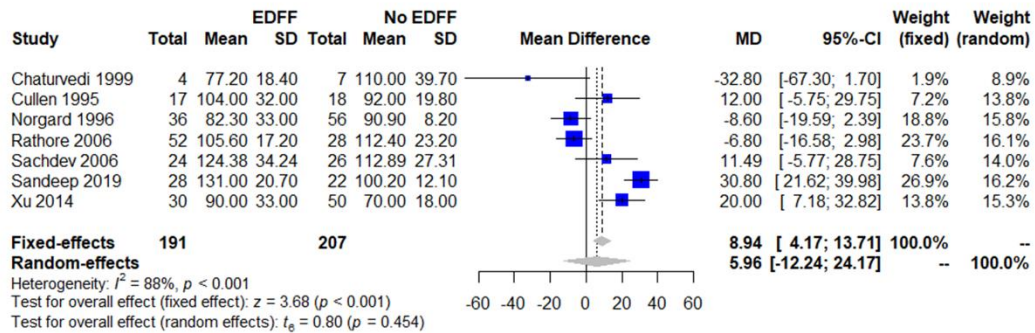

### B. Transatrial repair

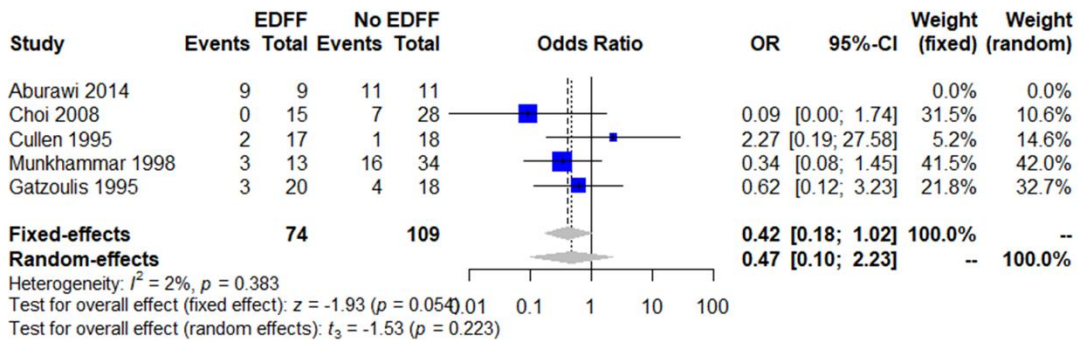

### C. Transannular patch repair

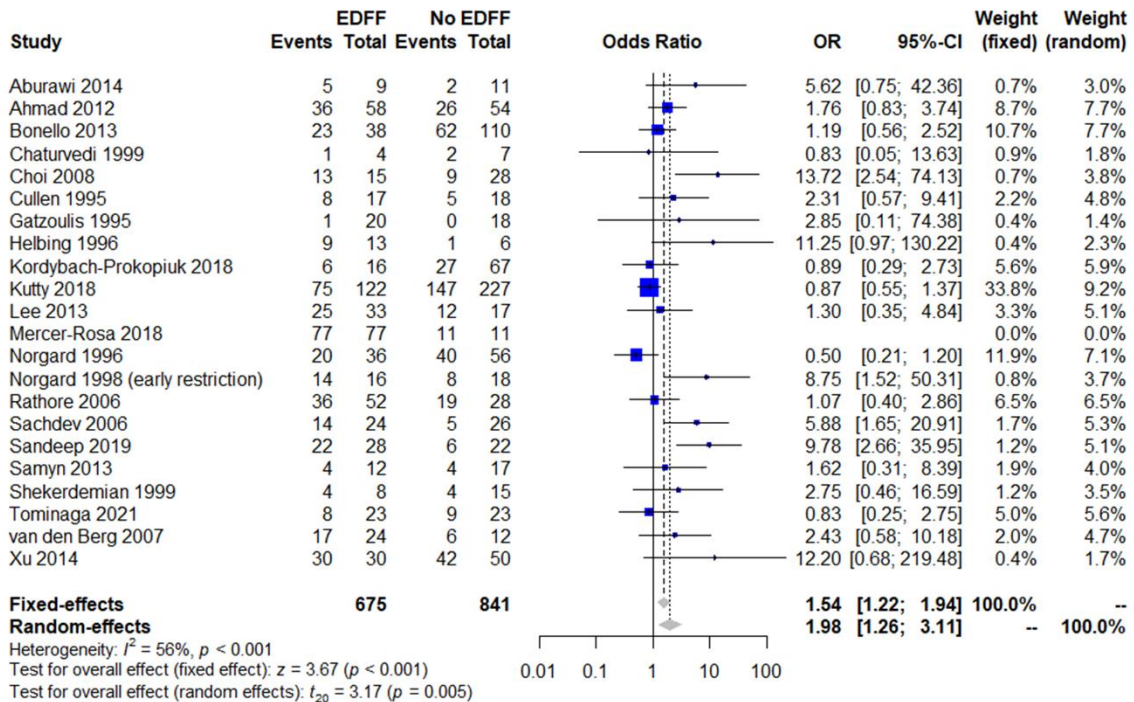

**Figure S4. Forest plots.** CI, confidence interval; EDFF, end-diastolic forward flow; ICU, intensive care unit; MD, mean difference; OR, odds ratio; SD, standard deviation.

### A. Outflow patch repair

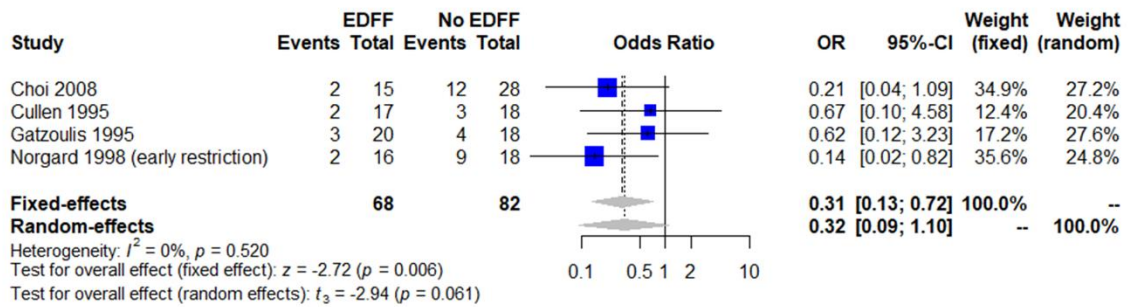

### B. ICU Length of stay (days)

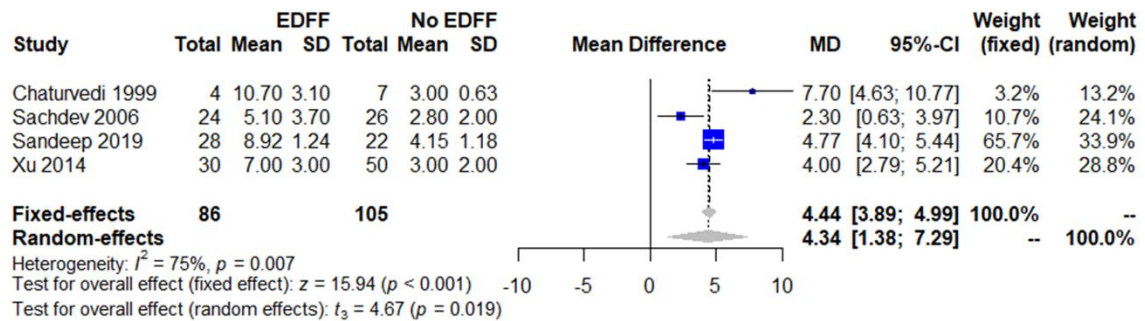



**Figure S5. Forest plots.** CI, confidence interval; EDFF, end-diastolic forward flow; MD, mean difference; RVEDVi, right ventricular end-diastolic volume indexed; RVESVi, right ventricular end-systolic volume indexed; RVSVi, right ventricular stroke volume indexed; SD, standard deviation.

### A. RVEDVi (mL/m<sup>2</sup>)

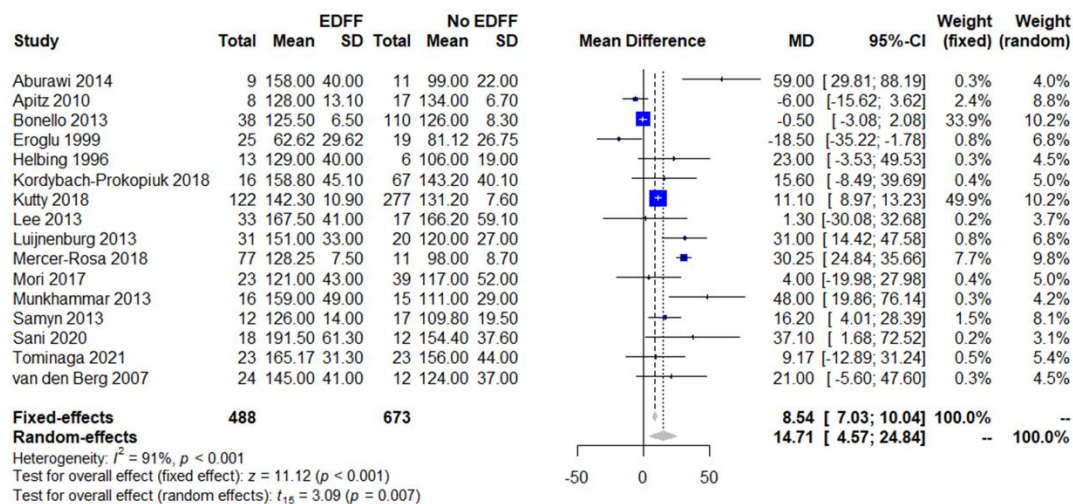

### B. RVESVi (mL/m<sup>2</sup>)

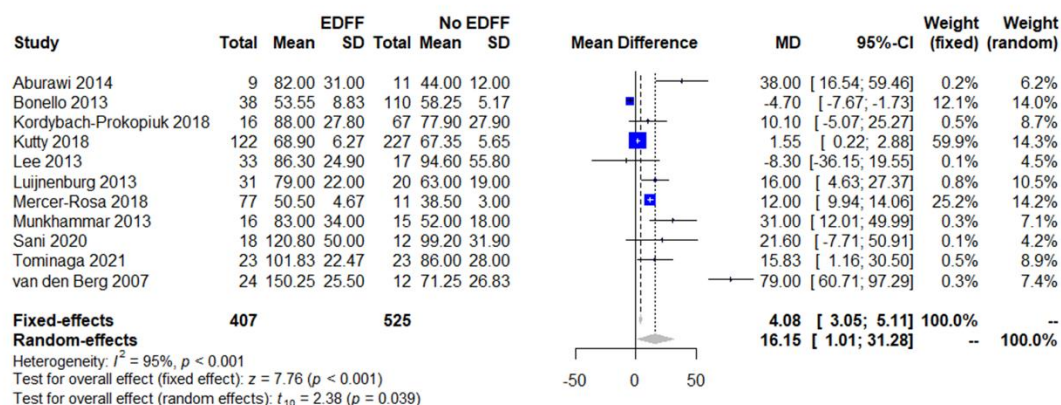

### C. RVSVi (mL/m<sup>2</sup>)

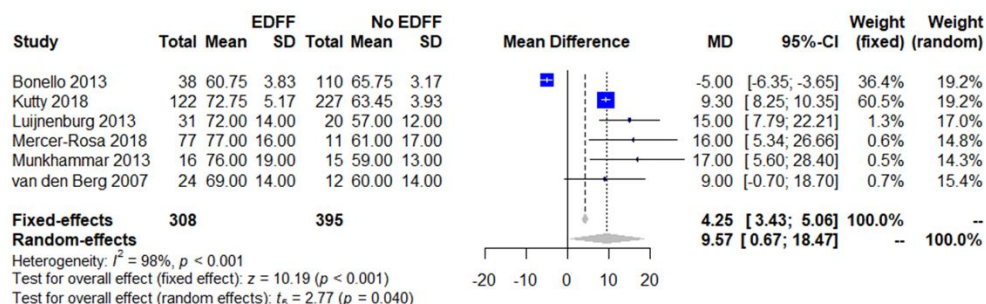

**Figure S6. Forest plots.** CI, confidence interval; EDFF, end-diastolic forward flow; MD, mean difference; RVEDP, right ventricular end-diastolic pressure; RVEF, right ventricular ejection fraction; RVESP, right ventricular end-systolic pressure; RVMi, right ventricular mass indexed; SD, standard deviation.

### A. RVMi (g/m<sup>2</sup>)

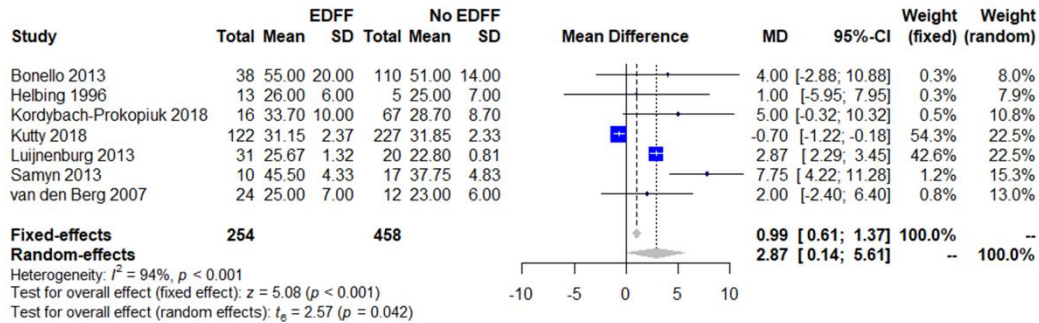

### B. RVEF (%)

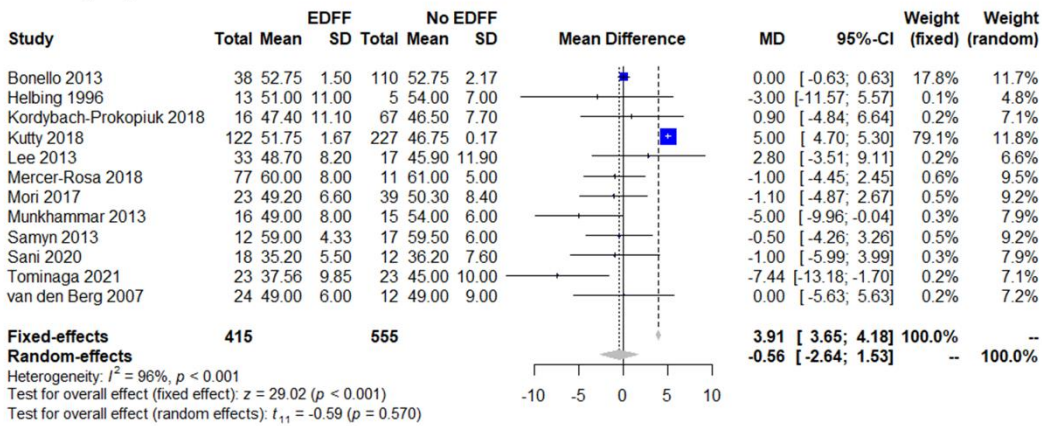

### C. RVEDP (mmHg)

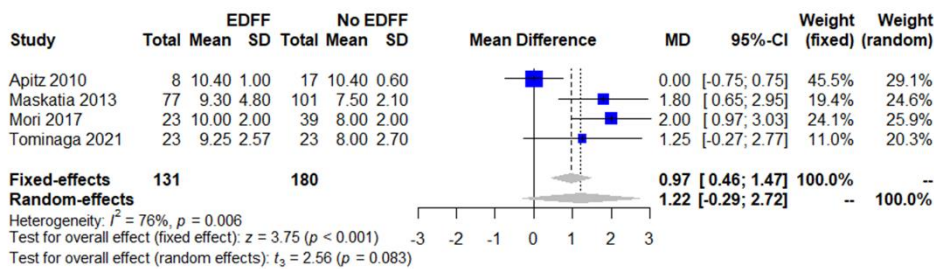

### D. RVESP (mmHg)

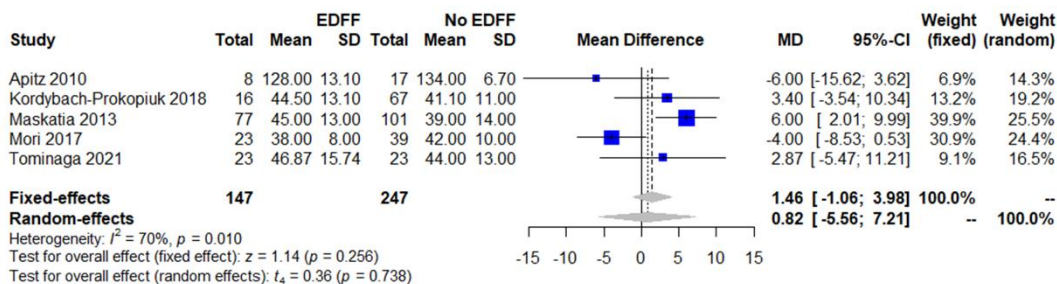

**Figure S7. Forest plots.** CI, confidence interval; EDFF, end-diastolic forward flow; LVEDVi, left ventricular end-diastolic volume indexed; LVEF, left ventricular ejection fraction; LVESVi, left ventricular end-systolic volume indexed; LVSVi, left ventricular stroke volume indexed; MD, mean difference; SD, standard deviation.

### A. LVEDVi (mL/m<sup>2</sup>)

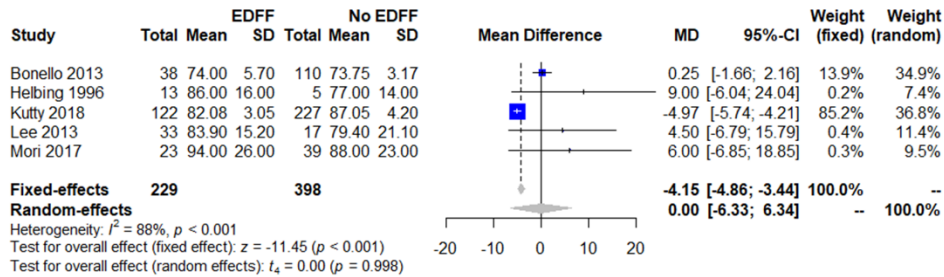

### B. LVESVi (mL/m<sup>2</sup>)

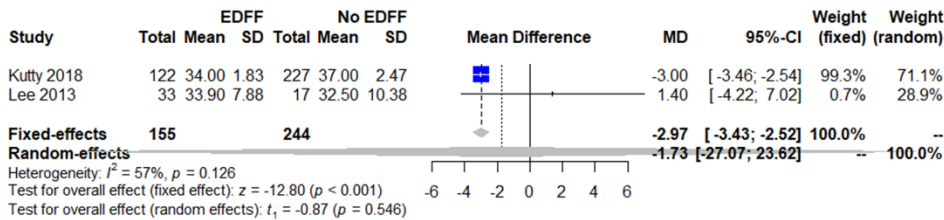

### C. LVSVi (mL/m<sup>2</sup>)

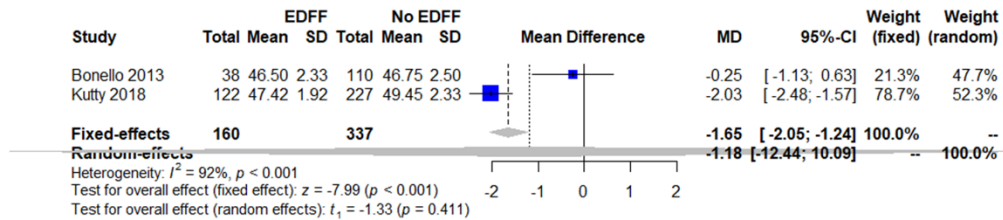

### D. LVEF (%)

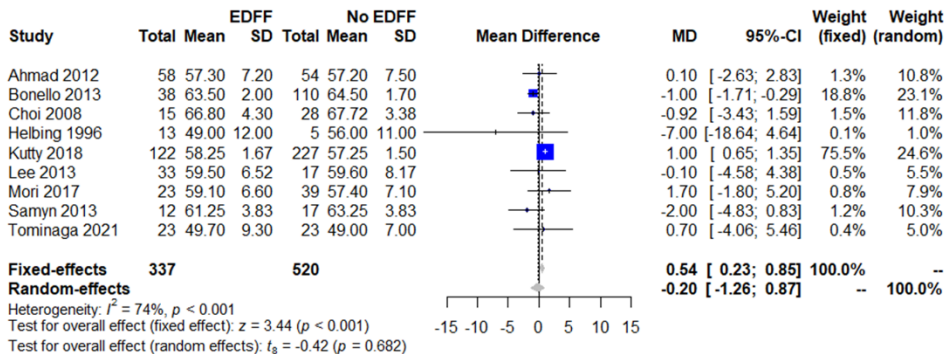

**Figure S8. Forest plots.** CI, confidence interval; EDFF, end-diastolic forward flow; MD, mean difference; RAAi, right atrial area indexed; RAVi, right atrial volume indexed; SD, standard deviation.

### A. RAAi (cm<sup>2</sup>/m<sup>2</sup>)

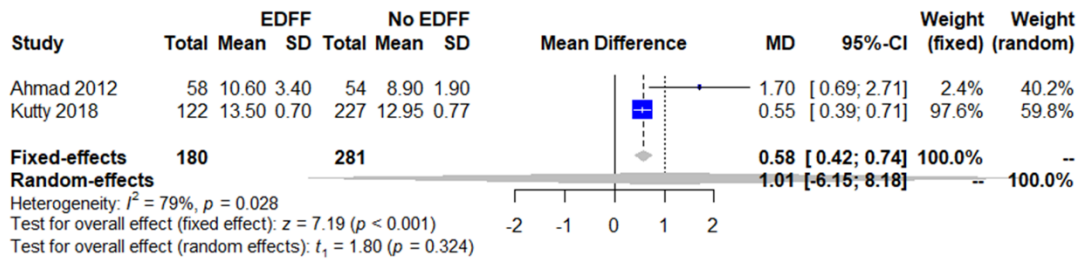

### B. RAVi (mL/m<sup>2</sup>)

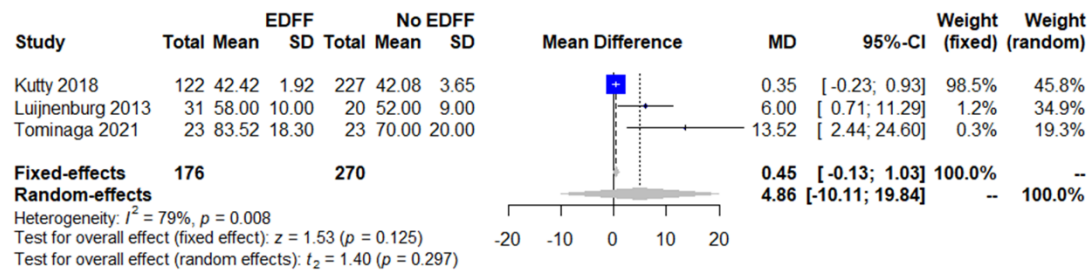

**Figure S9. Forest plots.** CI, confidence interval; EDFF, end-diastolic forward flow; MD, mean difference; SD, standard deviation.

**A. E wave velocity at the tricuspid valve (cm/sec)**

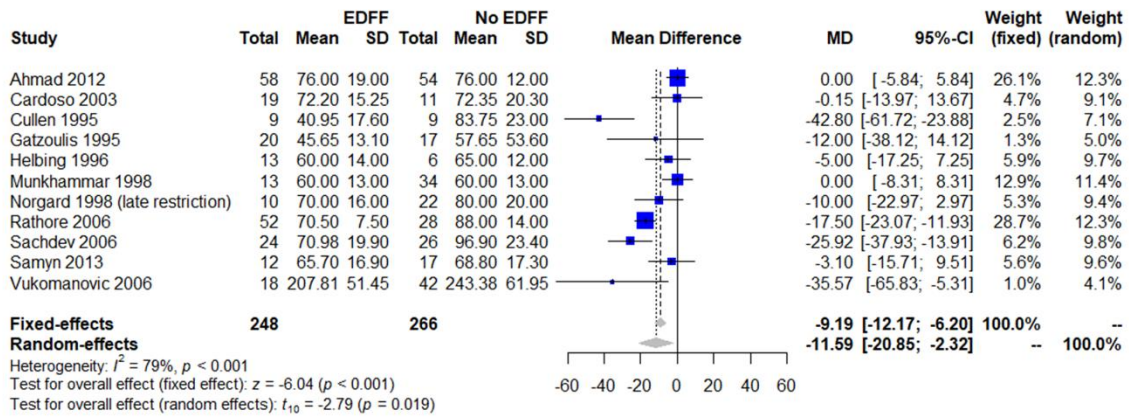

**B. E wave duration at the tricuspid valve (msec)**

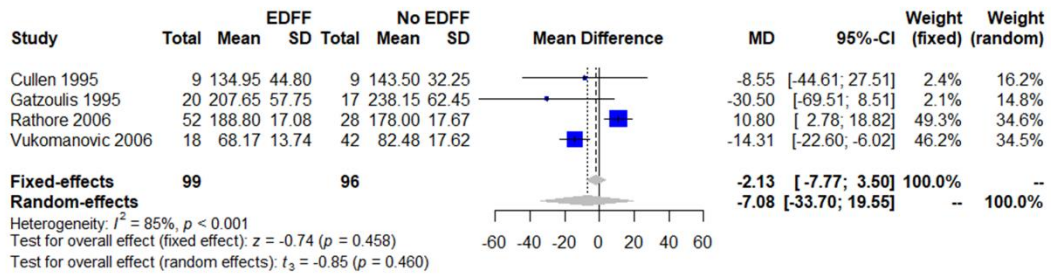

**C. E wave deceleration at the tricuspid valve (msec)**

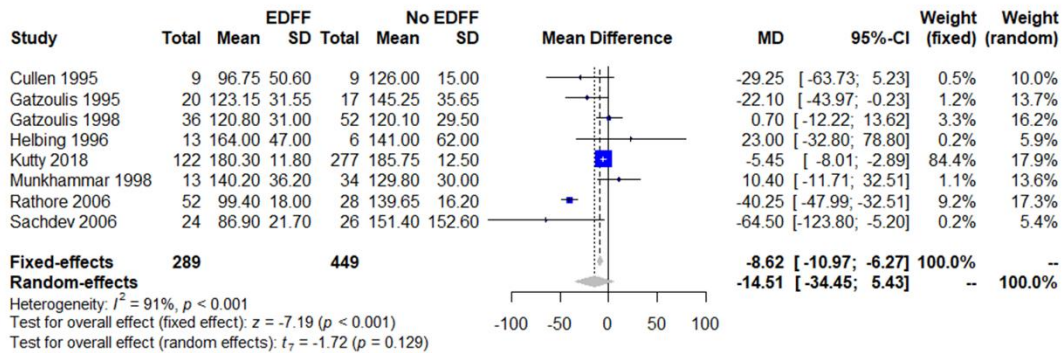

**Figure S10. Forest plots.** CI, confidence interval; EDFF, end-diastolic forward flow; MD, mean difference; SD, standard deviation.

### A. A wave velocity at the tricuspid valve (cm/sec)

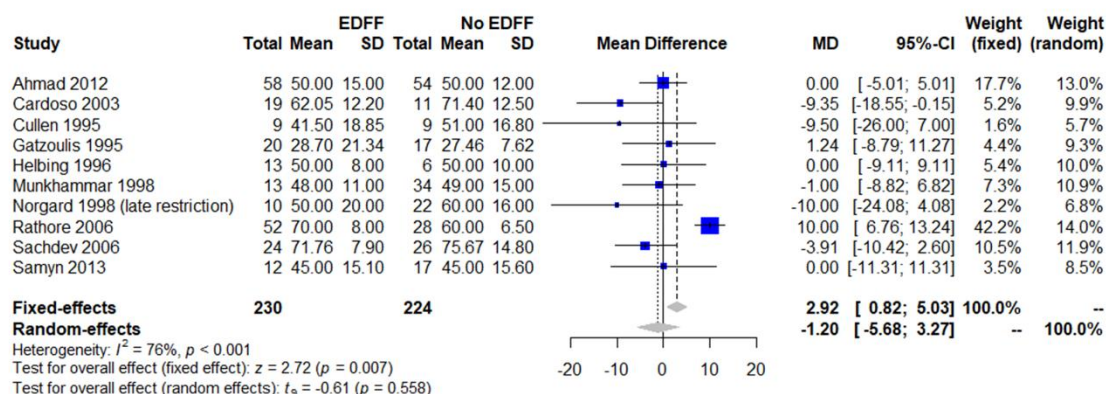

### B. A wave duration at the tricuspid valve (msec)

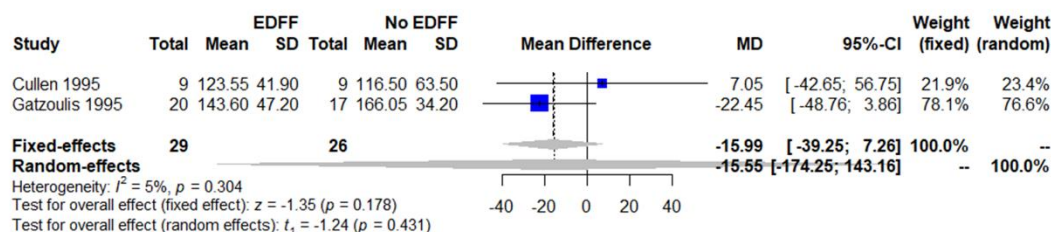

### C. E/A at the tricuspid valve

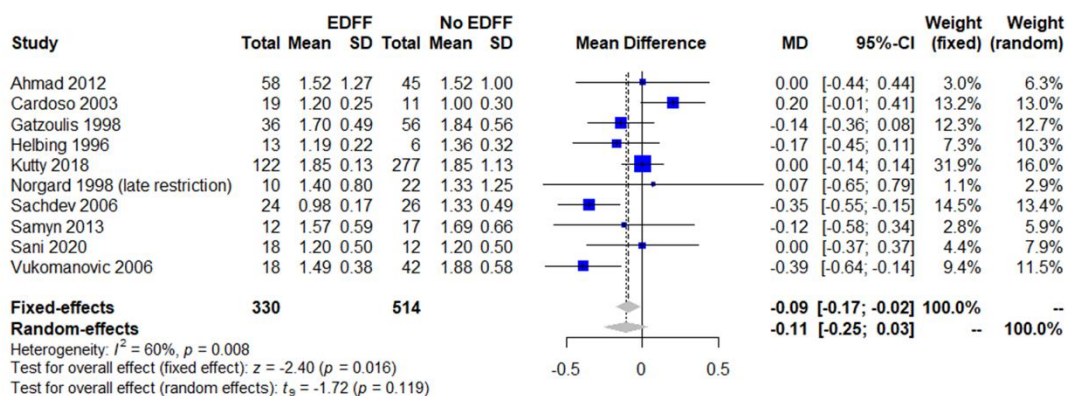

**Figure S11. Forest plots.** CI, confidence interval; EDFF, end-diastolic forward flow; MD, mean difference; SD, standard deviation.

**A. E' at the tricuspid valve (cm/sec)**

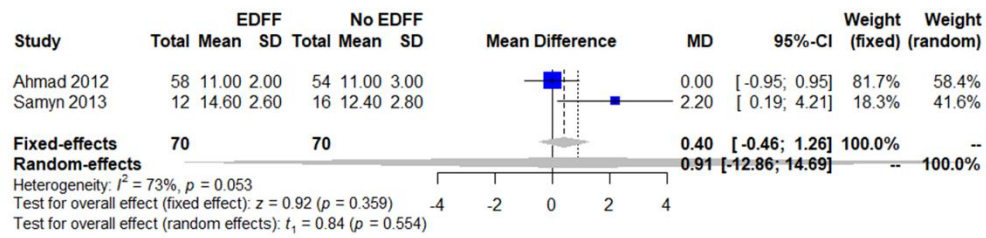

**B. A' at the tricuspid valve (cm/sec)**

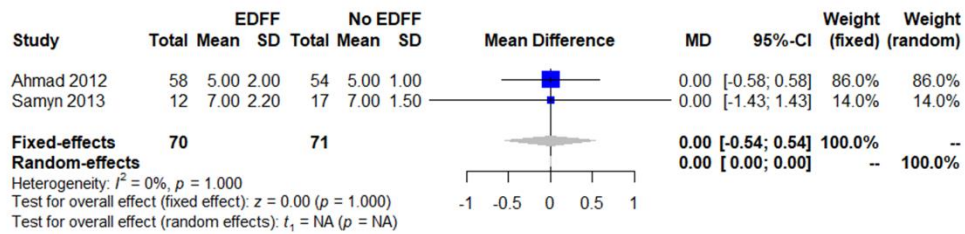

**C. E/E' at the tricuspid valve**

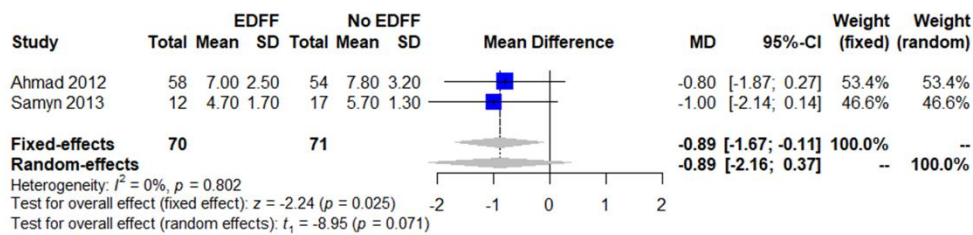

**Figure S12. Forest plots.** CI, confidence interval; EDFF, end-diastolic forward flow; MD, mean difference; OR, odds ratio; PR, pulmonary regurgitation; SD, standard deviation.

### A. Moderate to severe PR

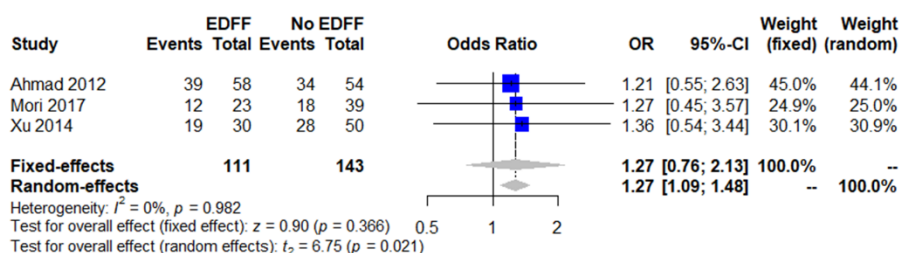

### B. PR fraction (%)

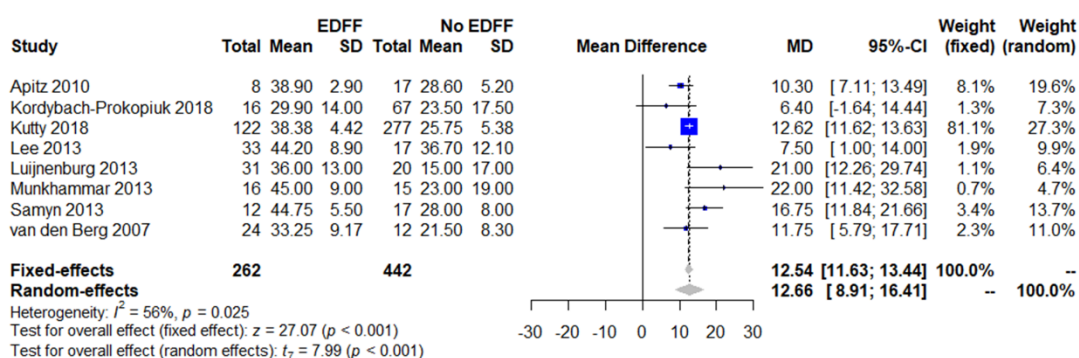

### C. PR duration (msec)

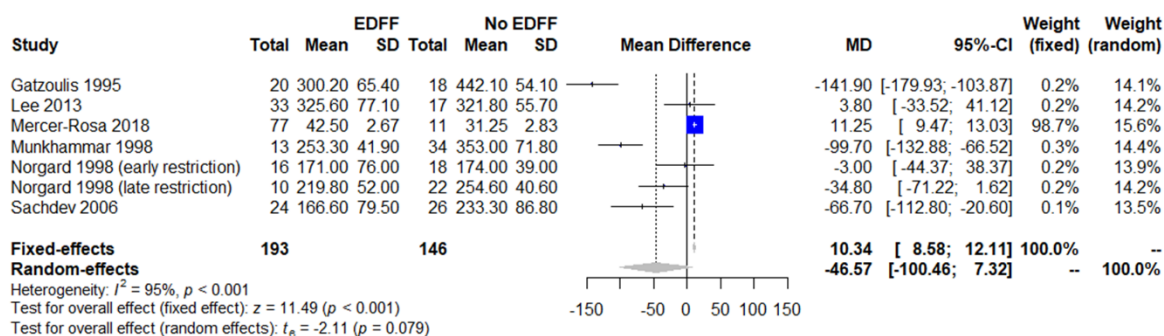



**Figure S13. Forest plots.** BNP, brain natriuretic peptide; CI, confidence interval; EDFF, end-diastolic forward flow; MD, mean difference; NT-proBNP, N-terminal pro hormone brain natriuretic peptide; OR, odds ratio; SD, standard deviation.

### A. QRS duration (msec)

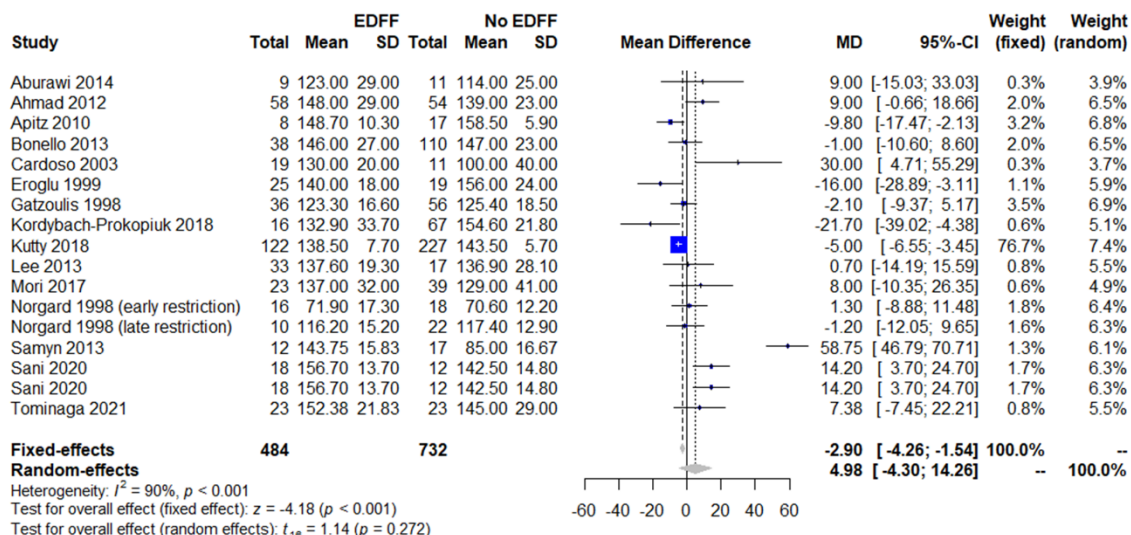

### B. BNP (pg/mL)

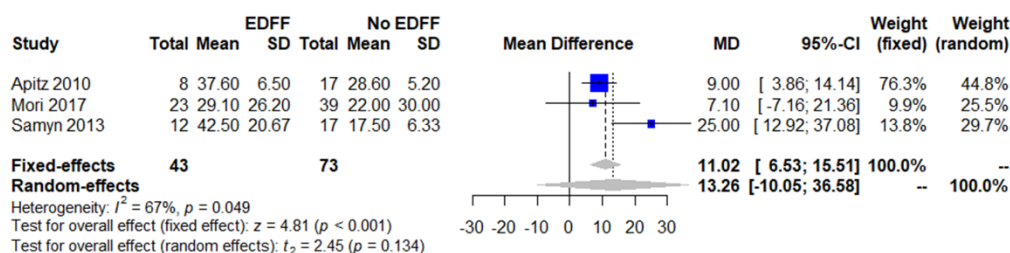

### C. NT-proBNP (pg/mL)

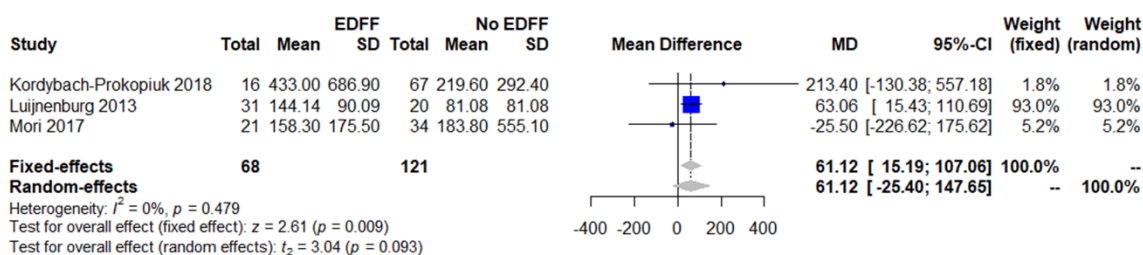

**Figure S14. Forest plots.** CI, confidence interval; EDFF, end-diastolic forward flow; MD, mean difference; OR, odds ratio; SD, standard deviation; VO<sub>2</sub>, oxygen consumption.

**A. Peak VO<sub>2</sub> (%)**

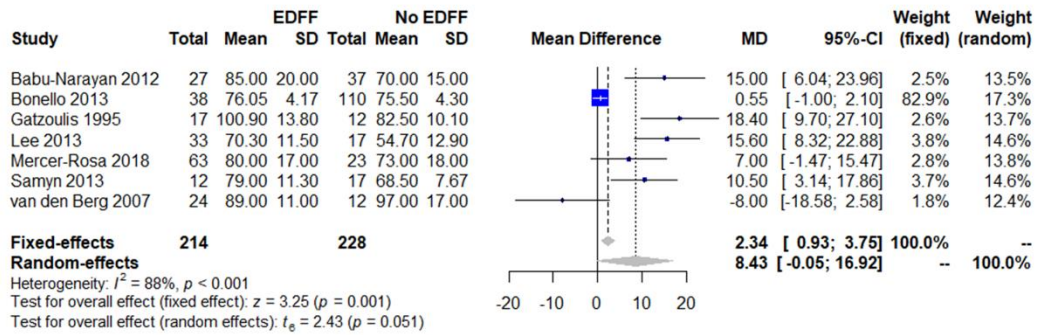

**B. Peak VO<sub>2</sub> (mL/kg/min)**

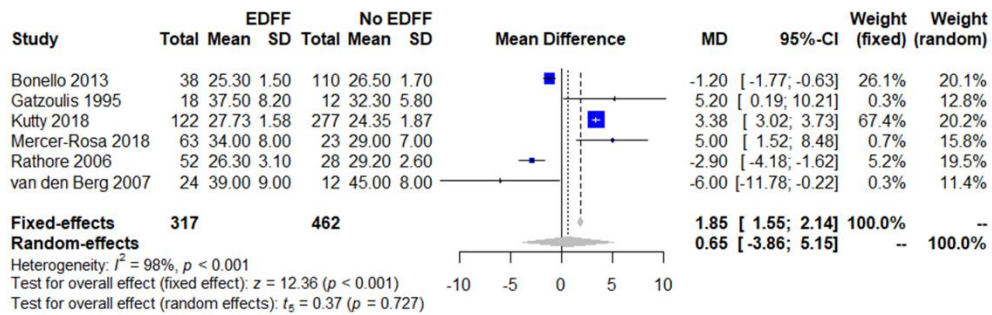

**Figure S15. Publication bias analysis by funnel plot graphic. (A) transannular patch repair.** (Begg and Mazumdar's test:  $p=0.025$ , Egger's test:  $p=0.002$ ). **(B) right atrial volume indexed.** (Begg and Mazumdar's test:  $p=0.117$ , Egger's test:  $p=0.014$ ). **(C) pulmonary regurgitation fraction.** (Begg and Mazumdar's test:  $p=0.453$ , Egger's test:  $p=0.038$ ). **(D) A wave velocity at the tricuspid valve.** (Begg and Mazumdar's test:  $p=0.655$ , Egger's test:  $p=0.005$ ).

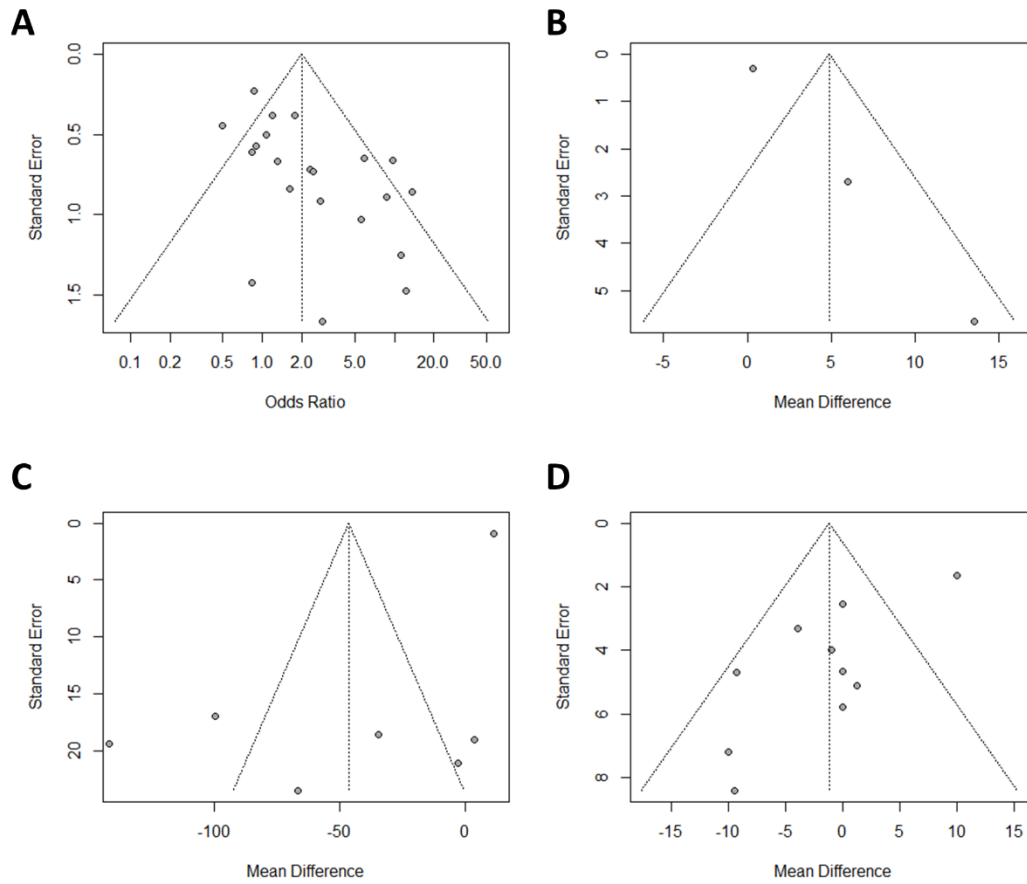

Supplement: JAH3-11-e024036-s001.pdf [file JAH3-11-e024036-s001.pdf]
